# Supplementary material for: Galloway–Mowat Syndrome Type 3 Caused by OSGEP Gene Variants: A Case Report and Literature Review
Source: Frontiers journal article supplement (doi:10.3389/fped.2022.899991), 2022-06-17
Supplement: Data_Sheet_1.PDF [file Data_Sheet_1.PDF]

Supplementary Table 1 The clinical manifestations and gene mutations of 37 patients with Galloway-Mowat syndrome type 3

| Case no.         | Nucleotide change (Amino acid change)          | Exon (Zyosity)               | Gender/GA (w)/BW (g)/Ethnic origin      | Parental Consanguinity/Family medical history/Prenatal findings                                                                                                                                                           | Proteinuria (onset)/NS/ESRD (onset)/Renal biopsy (at age)                                                                                                                                                                                                                                                      | Brain manifestations                                                                                                        | Cranial MRI findings                                                                                                          | Dysmorphic features                                                                                                                                                                                                                                                    | Other manifestations                                                                                                                                | Outcome                                                    |
|------------------|------------------------------------------------|------------------------------|-----------------------------------------|---------------------------------------------------------------------------------------------------------------------------------------------------------------------------------------------------------------------------|----------------------------------------------------------------------------------------------------------------------------------------------------------------------------------------------------------------------------------------------------------------------------------------------------------------|-----------------------------------------------------------------------------------------------------------------------------|-------------------------------------------------------------------------------------------------------------------------------|------------------------------------------------------------------------------------------------------------------------------------------------------------------------------------------------------------------------------------------------------------------------|-----------------------------------------------------------------------------------------------------------------------------------------------------|------------------------------------------------------------|
| 1[9]             | c.81C>G (p.Asn27Lys)                           | Exon 1 (Hom)                 | M/39+3/3400/Hispanic                    | Y/N/NA                                                                                                                                                                                                                    | Y (1.5m)/congenital NS/Y/DMS, tubular atrophy, primitive glomeruli                                                                                                                                                                                                                                             | microcephaly, hypotonia, developmental delay                                                                                | brain atrophy, poor myelination                                                                                               | no                                                                                                                                                                                                                                                                     | hyperkalemia, hyponatremia, hypomagnesemia                                                                                                          | died of progressive neurological deterioration at 8m       |
| 2[3]             | c.1A>T; c.839G>T (p.Arg280Leu)                 | Exon 1 (het); Exon 9 (het)   | M/NA/NA/Caucasian, Hispanic             | N/N/NA                                                                                                                                                                                                                    | Y (14m)/NS/NA/FSGS (15m)                                                                                                                                                                                                                                                                                       | microcephaly, myoclonic seizures, developmental delay, hypotonia, spasticity                                                | enlarged subdural/subarachnoidal spaces, poor myelination, gyral simplification, cerebellar atrophy                           | large and floppy ears, pinched nose                                                                                                                                                                                                                                    | visual impairment                                                                                                                                   | dead at 19m                                                |
| 3[3]             | c.40A>T (p.Ile14Phe)                           | Exon 1 (Hom)                 | F/preterm/NA/Iran, Caucasian            | Y/previous child of the family had microcephaly, seizures, renal failure (at 7m) and died at 13m due to status epilepticus/NA                                                                                             | Y (4m)/infantile SRNS/Y (2y)/NA                                                                                                                                                                                                                                                                                | microcephaly, globe developmental delay, spasticity, seizures                                                               | NA                                                                                                                            | large and floppy ears, short stature                                                                                                                                                                                                                                   | ASD                                                                                                                                                 | dead at 30m                                                |
| 4[3]             | c.40A>T (p.Ile14Phe)                           | Exon 1 (Hom)                 | M/NA/NA/Iran, White, Persian, Kurdish   | Y/two siblings of mother died neonatally of unknown cause/NA                                                                                                                                                              | Y (5m)/SRNS/Y (22m)/FSGS (10m)                                                                                                                                                                                                                                                                                 | microcephaly, abnormalities in motor development, speech delay, spasticity                                                  | NA                                                                                                                            | strabism, short stature                                                                                                                                                                                                                                                | N                                                                                                                                                   | dead at 25m                                                |
| 5[9]             | c.157A>T (p.Ile53Phe)                          | Exon 2 (Hom)                 | F/40+2/2940/Pakistani                   | Y/N/NA                                                                                                                                                                                                                    | Y (2.5m)/congenital NS/NA/increased glomerular mesangial matrix                                                                                                                                                                                                                                                | microcephaly, hypotonia, developmental delay, seizures, failure to thrive                                                   | brain atrophy                                                                                                                 | wide nasal bridge, aquiline nose, retrognathia, low set ears, arachnodactyly                                                                                                                                                                                           | electrolyte disorders                                                                                                                               | died of cardiorespiratory arrest in a sepsis context at 7m |
| 6[3]             | c.232A>G (p.Lys78Glu); c.973C>T (p.Arg325Trp)  | Exon2 (het); Exon11 (het)    | M/NA/NA/Hispanic                        | N/N/NA                                                                                                                                                                                                                    | Y (6m)/infantile NS/Y (24m)/FSGS (6m)                                                                                                                                                                                                                                                                          | microcephaly, hypotonia, hyperreflexia, developmental delay, speech delay                                                   | poor myelination                                                                                                              | facial dysmorphism, esotropia, camptodactyly                                                                                                                                                                                                                           | PDA, ASD                                                                                                                                            | alive with ESRD under RRT at 24m                           |
| 7[15]            | c.133dupA; c.608C>T (p.Ser203Leu)              | Exon 2 (het); Exon 6 (het)   | F/39+6/3100/China                       | N/previous child of the family had microcephaly, seizures, global developmental delay, hydrocephalus, facial dysmorphism (esotropia, low nasal bridge and long philtrum), and died at 8y/(US) a small biparietal diameter | Y (4y)/N/N/N                                                                                                                                                                                                                                                                                                   | microcephaly, hypotonia, global developmental delay, failure to thrive                                                      | brain atrophy                                                                                                                 | esotropia, deeply-set eye, low nasal bridge, long philtrum, single transverse palmar crease, calcaneovalgus deformity                                                                                                                                                  | N                                                                                                                                                   | alive at 4y                                                |
| 8[3]             | c.319G>A (p.Val107Met)                         | Exon 3 (Hom)                 | M/NA/NA/European                        | N/parental second cousin with ESRD during adolescence/NA                                                                                                                                                                  | Y (0.5m)/congenital NS/Y (2.5m)/NA                                                                                                                                                                                                                                                                             | microcephaly, hypotonia, developmental delay, seizures                                                                      | pachygyria, polymicrogyria                                                                                                    | arachnodactyly, camptodactyly                                                                                                                                                                                                                                          | N                                                                                                                                                   | dead at 2.5m                                               |
| 9[3]             | c.328T>C (p.Cys110Arg); c.332T>C (p.Ile111Thr) | Exon 3 (het); Exon 3 (het)   | F/NA/NA/Netherlands                     | N/N/oligohydramnios                                                                                                                                                                                                       | Y (1m)/congenital NS/Y (1m)/DMS                                                                                                                                                                                                                                                                                | microcephaly, developmental delay                                                                                           | reduced gyration, cerebellar hypoplasia, abnormal myelination                                                                 | long convex beaked nose, thin upper lip, down turned corners of the mouth, micrognathia, pointed chin, arachnodactyly, adducted thumbs, dislocated hips, talipes calcaneovalgus                                                                                        | N                                                                                                                                                   | dead at 1.5m                                               |
| 10[3]            | c.328T>C (p.Cys110Arg); c.530G>C (p.Gly177Ala) | Exon 3 (het); Exon 5 (het)   | F/NA/NA/USA                             | N/N/NA                                                                                                                                                                                                                    | N/N/NA/NA                                                                                                                                                                                                                                                                                                      | microcephaly, seizures                                                                                                      | lissencephaly, hypogenesis of corpus callosum                                                                                 | large and floppy ears, unusual fat distribution, congenital hip dislocation                                                                                                                                                                                            | poor wound healing                                                                                                                                  | dead at 2.5y                                               |
| 11[3]            | c.328T>C (p.Cys110Arg); c.530G>C (p.Gly177Ala) | Exon 3 (het); Exon 5 (het)   | M/NA/NA/USA                             | N/N/NA                                                                                                                                                                                                                    | N/N/NA/NA                                                                                                                                                                                                                                                                                                      | microcephaly                                                                                                                | lissencephaly                                                                                                                 | large and floppy ears, unusual fat distribution                                                                                                                                                                                                                        | poor wound healing                                                                                                                                  | alive at 7m                                                |
| 12[3]            | c.328T>C (p.Cys110Arg); c.838C>T (p.Arg280Cys) | Exon 3 (het); Exon 9 (het)   | F/NA/NA/USA                             | N/N/NA                                                                                                                                                                                                                    | Y (19m)/NS/NA/FSGS                                                                                                                                                                                                                                                                                             | microcephaly, seizures, developmental delay, speech delay, repetitive movements                                             | cerebellar atrophy                                                                                                            | NA                                                                                                                                                                                                                                                                     | N                                                                                                                                                   | alive at 19m                                               |
| 13*[3]           | c.328T>C (p.Cys110Arg); c.974G>A (p.Arg325Gln) | Exon 3 (het); Exon11 (het)   | M/NA/NA/Caucasian                       | N/affected siblings/NA                                                                                                                                                                                                    | Y (3m)/congenital NS/Y (11m)/NA                                                                                                                                                                                                                                                                                | microcephaly, myoclonus, developmental delay                                                                                | lissencephaly                                                                                                                 | narrow forehead, large, low-set ears, small mouth, micrognathia, short stature                                                                                                                                                                                         | hiatal hernia                                                                                                                                       | dead at 13m                                                |
| 14*[3]           | c.328T>C (p.Cys110Arg); c.974G>A (p.Arg325Gln) | Exon 3 (het); Exon11 (het)   | M/NA/NA/Caucasian                       | N/affected siblings/NA                                                                                                                                                                                                    | Y (at birth)/congenital NS/NA/NA                                                                                                                                                                                                                                                                               | microcephaly, seizures, spasticity, developmental delay                                                                     | NA                                                                                                                            | NA                                                                                                                                                                                                                                                                     | N                                                                                                                                                   | NA                                                         |
| 15[3]            | c.416T>C (p.Ile139Thr)                         | Exon 4 (Hom)                 | M/NA/NA/Turkish                         | Y/N/NA                                                                                                                                                                                                                    | Y (13y)/SRNS/N/FSGS                                                                                                                                                                                                                                                                                            | no                                                                                                                          | NA                                                                                                                            | NA                                                                                                                                                                                                                                                                     | diabetes mellitus type II                                                                                                                           | alive at 13y                                               |
| 16[3]            | c.416T>C (p.Ile139Thr)                         | Exon 4 (Hom)                 | F/NA/NA/Turkish                         | Y/N/NA                                                                                                                                                                                                                    | Y (11m)/SRNS/Y (12.5y)/FSGS                                                                                                                                                                                                                                                                                    | recurrent headaches, double vision                                                                                          | retro bulbar intra orbital lymphatic malformation                                                                             | NA                                                                                                                                                                                                                                                                     | aneurysm of the ascending aorta                                                                                                                     | alive at 13y                                               |
| 17[3]            | c.593A>G (p.Lys198Arg); c.740G>A (p.Arg247Gln) | Exon 6 (het); Exon 8 (het)   | F/NA/NA/Asia                            | N/N/NA                                                                                                                                                                                                                    | Y (14m)/infantile NS/NA/NA                                                                                                                                                                                                                                                                                     | microcephaly, seizures, intellectual disability, delay motor milestones, hypotonia                                          | brain atrophy, atrophic corpus callosum, smaller ventral pons, enlarged subdural/subarachnoidal spaces                        | ptosis, entropion repair, short stature                                                                                                                                                                                                                                | NA                                                                                                                                                  | dead at 2y                                                 |
| 18*[3]           | c.740G>A (p.Arg247Gln)                         | Exon 8 (Hom)                 | M/37/2118/China                         | N/affected siblings(US at 32w) oligohydramnios, microcephaly; (fetal MRI at 34w) pachygyria, myelination defects; IUGR                                                                                                    | Y (1m)/congenital NS/Y (4m)/NA                                                                                                                                                                                                                                                                                 | microcephaly, seizures, developmental delay, hypotonia                                                                      | pachygyria, poor myelination                                                                                                  | large and floppy ears, micrognathia, hypertelorism, microphthalmia, sunken eyeballs, coarse hair, a narrow forehead, a beak nose, prominent glabella with a broad nasal bridge, high arch palate, camptodactyly, arachnodactyly, clenched hands, mild hip contractures | cryptorchidism, micropenis, ectopic kidney, auditory and visual dysfunction                                                                         | died of multiorgan failure at 5m                           |
| 19*[3]           | c.740G>A (p.Arg247Gln)                         | Exon 8 (Hom)                 | F/40/2496/China                         | N/affected siblings(US at 27w) oligohydramnios, microcephaly; (fetal MRI at 32w) pachygyria, cerebellar atrophy; IUGR                                                                                                     | Y (2d)/congenital NS/NA/NA                                                                                                                                                                                                                                                                                     | microcephaly, seizures, developmental delay, hypotonia                                                                      | pachygyria, poor myelination, cerebellar atrophy                                                                              | large and floppy ears, micrognathia, hypertelorism, microphthalmia, sunken eyeballs, a narrow forehead, a beak nose, prominent glabella with a broad nasal bridge, high arch palate, arachnodactyly                                                                    | laryngomalacia, swallowing disturbance, significant lactic aciduria                                                                                 | died of multiorgan failure at 3m                           |
| 20[3]            | c.740G>A (p.Arg247Gln)                         | Exon 8 (Hom)                 | M/40/2496/China                         | N/affected siblings/oligohydramnios, IUGR                                                                                                                                                                                 | Y (at birth)/congenital NS/Y (1m)/NA                                                                                                                                                                                                                                                                           | microcephaly, developmental delay, opisthotonos                                                                             | broad gyri and hypoplasia of sulci in frontotemporal areas, possible leukoencephalopathy, subdural fluid collection           | hypertelorism, deep-set eyes, micrognathia, arachnodactyly                                                                                                                                                                                                             | lactic aciduria, pulmonary edema                                                                                                                    | dead at 3m                                                 |
| 21[3]            | c.740G>A (p.Arg247Gln)                         | Exon 8 (Hom)                 | M/36/2345/China                         | N/N/(US at 34w) oligohydramnios, microcephaly, IUGR                                                                                                                                                                       | Y (at birth)/congenital NS/NA/NA                                                                                                                                                                                                                                                                               | microcephaly, hypotonia, developmental delay                                                                                | pachygyria, hypomyelination                                                                                                   | large and floppy ears, micrognathia, hypertelorism, microphthalmia, sunken eyeballs, a narrow forehead, a beak nose, prominent glabella with a broad nasal bridge, high arch palate, arachnodactyly                                                                    | micropenis, mild hearing impairment                                                                                                                 | died of multiorgan failure at 3m                           |
| 22[3]            | c.740G>A (p.Arg247Gln)                         | Exon 8 (Hom)                 | F/39/2460/China                         | N/N/IUGR, microcephaly                                                                                                                                                                                                    | Y (1.5m)/congenital NS/N/light microscopy-mild glomerular changes, cystic dilatation of tubular lumina, tubular atrophy with proteinaceous casts, and arteriolar medial hypertrophy; electron microscopy-an irregular thickness of the glomerular basement membrane, complete effacement of the foot processes | microcephaly, seizures, hypotonia, developmental delay                                                                      | pachygyria, hypomyelination                                                                                                   | large and floppy ears, micrognathia, hypertelorism, microphthalmia, sunken eyeballs, a narrow forehead, a beak nose, prominent glabella with a broad nasal bridge, high arch palate, arachnodactyly                                                                    | hearing and visual dysfunction                                                                                                                      | died of multiorgan failure at 3m                           |
| 23[3]            | c.740G>A (p.Arg247Gln)                         | Exon 8 (Hom)                 | M/36/2350/China                         | N/N/IUGR                                                                                                                                                                                                                  | Y (at birth)/congenital NS/NA/NA                                                                                                                                                                                                                                                                               | microcephaly                                                                                                                | simplified gyri and sulci, pachygyria in the frontal lobes, reduced density of the frontal white matter                       | micrognathia, arachnodactyly                                                                                                                                                                                                                                           | N                                                                                                                                                   | dead at 3.5m                                               |
| 24[3]            | c.740G>A (p.Arg247Gln)                         | Exon 8 (Hom)                 | M/28/840/China                          | N/N/IUGR                                                                                                                                                                                                                  | Y (1m)/congenital NS/NA/NA                                                                                                                                                                                                                                                                                     | microcephaly                                                                                                                | brain atrophy, hypodense cerebral white matter, thin corpus callosum                                                          | floppy ears, micrognathia, arachnodactyly                                                                                                                                                                                                                              | N                                                                                                                                                   | dead at 6m                                                 |
| 25[3]            | c.740G>A (p.Arg247Gln)                         | Exon 8 (Hom)                 | M/39/2034/China                         | N/N/IUGR                                                                                                                                                                                                                  | Y (1m)/congenital NS/N/diffuse foot process effacement                                                                                                                                                                                                                                                         | microcephaly                                                                                                                | cerebral and cerebellar atrophy, simplified frontal and temporal gyration, white matter changes                               | flat nasal bridge, micrognathia, arachnodactyly                                                                                                                                                                                                                        | abnormal EEG (diffuse cortical dysfunction)                                                                                                         | dead at 5m                                                 |
| 26[3]            | c.740G>A (p.Arg247Gln)                         | Exon 8 (Hom)                 | F/34/NA/Asia                            | N/N/NA                                                                                                                                                                                                                    | Y (at birth)/congenital NS/NA/collapsing FSGS                                                                                                                                                                                                                                                                  | microcephaly, hypotonia                                                                                                     | cerebellar vermis atrophy with prominent interfoliate sulci, thrombosed left transverse sinus, underdeveloped cortical ribbon | hypertelorism, down slanting palpebral fissures, camptodactyly                                                                                                                                                                                                         | ASD                                                                                                                                                 | dead at 2m                                                 |
| 27[17]           | c.740G>A (p.Arg247Gln)                         | Exon 8 (Hom)                 | M/38/2340/China                         | N/NA/(US at 35w) oligohydramnios, microcephaly, IUGR                                                                                                                                                                      | Y (1m)/congenital NS/NA/light microscopy-DMS with increase of mesangial cells and matrix; electron microscopy-global multilayering and irregular thickening of glomerular basement membrane                                                                                                                    | microcephaly, hypotonia, developmental delay, seizures                                                                      | pachygyria (CT)                                                                                                               | large and floppy ears, micrognathia, hypertelorism, microphthalmia, sunken eyeballs, coarse hair, a narrow forehead, a beak nose, prominent glabella with a broad nasal bridge, high arch palate, arachnodactyly, camptodactyly                                        | micropenis                                                                                                                                          | died of multiorgan failure at 2m                           |
| 28 (Patient I)   | c.740G>A (p.Arg247Gln)                         | Exon 8 (Hom)                 | F/36+4/1500/Asia                        | N/N/IUGR                                                                                                                                                                                                                  | Y (2d)/congenital NS/N/N                                                                                                                                                                                                                                                                                       | microcephaly, developmental delay, hypotonia, failure to thrive                                                             | periventricular leukomalacia, hypomyelination, gyral abnormalities, bilateral lateral ventricle dilation                      | narrow forehead, hypertelorism, microphthalmia, large and floppy ears, broad nasal bridge, micrognathia, arachnodactyly, camptodactyly                                                                                                                                 | neonatal asphyxia, renal impairment, ascites, electrolyte disturbance(hyponatremia, hypokalemia, hypocalcemia, hypomagnesemia), marked abnormal EEG | died of cardiorespiratory arrest at 3m                     |
| 29 (Patient II)  | c.740G>A (p.Arg247Gln)                         | Exon 8 (Hom)                 | M/32+2/1070/China                       | N/N/IUGR, oligohydramnios                                                                                                                                                                                                 | Y (2m)/congenital NS/NA/N                                                                                                                                                                                                                                                                                      | microcephaly, developmental delay, failure to thrive                                                                        | hypomyelination, enlarged extracranial space                                                                                  | narrow forehead, large and floppy ears, arachnodactyly, camptodactyly                                                                                                                                                                                                  | cytomegalovirus infection, biliary atresia, electrolyte disturbance, abnormal EEG                                                                   | dead at 5m                                                 |
| 30[16]           | c.740G>A (p.Arg247Gln)                         | Exon 8 (Hom)                 | M/NA/NA/China                           | NA/NA/NA                                                                                                                                                                                                                  | NA/NA/NA/NA                                                                                                                                                                                                                                                                                                    | focal refractory seizures, developmental delay                                                                              | lissencephaly                                                                                                                 | NA                                                                                                                                                                                                                                                                     | NA                                                                                                                                                  | dead at 4m                                                 |
| 31[3]            | c.740G>A (p.Arg247Gln); c.411+12_411+22delins9 | Exon 8 (het); Intron 3 (het) | F/38/1954/China                         | N/previous child of the family had renal failure from age 5m and died at 13m/(US at 38w) oligohydramnios, microcephaly, IUGR                                                                                              | Y (2d)/congenital NS/Y (19m)/NA                                                                                                                                                                                                                                                                                | microcephaly, hypotonia, developmental delay, seizures                                                                      | pachygyria (CT)                                                                                                               | large and floppy ears, micrognathia, hypertelorism, microphthalmia, sunken eyeballs, a narrow forehead, a beak nose, prominent glabella with a broad nasal bridge, arachnodactyly                                                                                      | N                                                                                                                                                   | died of multiorgan failure at 20m                          |
| 32 (Patient III) | c.740G>A (p.Arg247Gln); c.560G>A (p.Gly187Val) | Exon 8 (het); Exon 6 (het)   | M/37/2620/China                         | N/N/oligohydramnios                                                                                                                                                                                                       | Y (3d)/NA/NA/NA                                                                                                                                                                                                                                                                                                | microcephaly, developmental delay, hypotonia                                                                                | small ependymal cysts on both sides (US)                                                                                      | hypertelorism, micrognathia                                                                                                                                                                                                                                            | N                                                                                                                                                   | alive at 3m                                                |
| 33[3]            | c.974G>A (p.Arg325Gln); c.236-2delA            | Exon 11 (het); Exon 3 (het)  | M/NA/NA/Jordan                          | N/sister affected and deceased/NA                                                                                                                                                                                         | Y (6m)/infantile NS/Y (6m)/NA                                                                                                                                                                                                                                                                                  | microcephaly, developmental delay                                                                                           | cerebral atrophy, bilateral lissencephaly predominantly in frontotemporal regions, thin corpus callosum                       | low-set ears, hypertelorism, small down ward slanting eyes                                                                                                                                                                                                             | N                                                                                                                                                   | dead at 6m                                                 |
| 34[3]            | c.974G>A (p.Arg325Gln); c.839G>A (p.Arg280His) | Exon 11 (het); Exon 9 (het)  | M/NA/NA/Africa                          | N/older brother affected (SRNS at 22m) and deceased from ESKD at 14y/NA                                                                                                                                                   | Y (13m)/NS/N/NA                                                                                                                                                                                                                                                                                                | microcephaly, developmental delay, aggressive behavior                                                                      | myelination delay, cerebellar atrophy, atrophy of upper spinal cord and medulla                                               | NA                                                                                                                                                                                                                                                                     | N                                                                                                                                                   | alive at 10.5y                                             |
| 35*[14]          | c.974G>A (p.Arg325Gln)                         | Exon 11 (Hom)                | F/term/2600/Arab                        | Y/affected siblings/normal                                                                                                                                                                                                | Y/N/N/N                                                                                                                                                                                                                                                                                                        | microcephaly, hypotonia, global developmental delay, failure to thrive                                                      | cerebellar atrophy                                                                                                            | microphthalmia, nystagmus, upturned nose, antimongoloid slant, high-arched palate, thoracolumbar kyphosis                                                                                                                                                              | hypertension, hypomagnesemia                                                                                                                        | died of hypertensive crisis at 6.5y                        |
| 36*[14]          | c.974G>A (p.Arg325Gln)                         | Exon 11 (Hom)                | M/term/3800/Arab                        | Y/affected siblings/a hypoplastic left heart and aortic coarctation                                                                                                                                                       | Y/N/N/N                                                                                                                                                                                                                                                                                                        | microcephaly, nystagmus, hypotonia, global developmental delay, failure to thrive                                           | leukodystrophy                                                                                                                | frontal bossing, microphthalmia, bilateral coloboma, bilateral ptosis, antimongoloid slant, strabismus, nystagmus, pectus excavatum and chest wall asymmetry, arachnodactyly                                                                                           | a hypoplastic left heart, aortic coarctation, cryptorchidism, hypomagnesemia, hypocalcemia                                                          | died of respiratory insufficiency at 8y                    |
| 37[3, 18]        | c.974G>A (p.Arg325Gln)                         | Exon 11 (Hom)                | F/term/3288/Caucasian (American Indian) | N/N/normal                                                                                                                                                                                                                | Y (3.5y)/N/N/N                                                                                                                                                                                                                                                                                                 | microcephaly, globe developmental delay, hypotonia (trunk), spasticity (lower limbs), status epilepticus, failure to thrive | hypomyelination, atrophy of the cerebellum and the brain stem                                                                 | large ears, frontal bossing, broad nasal bridge, high-arched palate, scarce eyebrows                                                                                                                                                                                   | recurrent urinary tract infections, neurogenic bladder dysfunction, partial Fanconi syndrome, bladder stone and nephrolithiasis,                    | alive at 7y                                                |

ASD, atrial septal defect; BW, birth weight; CT, computerized tomography; DMS, diffuse mesangial sclerosis; d, day; EEG, electroencephalography; ESRD, end stage renal disease; FSGS, focal segmental glomerulosclerosis; F, female; GA, gestational age; het, heterozygous; hom, homozygous; IUGR, intrauterine growth retardation; M, male; N, no; NA, not available; NS, nephrotic syndrome; m, month; MRI, magnetic resonance imaging; PDA, patent ductus arteriosus; RRT, renal replacement therapy; SRNS, steroid resistant nephrotic syndrome; USA, United States Of America; US, ultrasonography; Y, yes; y, year; w, week; \* = individuals from one family.
